# Supplementary material for: The AC Soft Magnetic Properties of FeCoNixCuAl (1.0 ≤ x ≤ 1.75) High-Entropy Alloys
Source: PubMed Central journal article supplement (PMC6947456; doi:10.3390/ma12244222), 2019-12-16
Supplement: materials-12-04222-s001.pdf [file materials-12-04222-s001.pdf]

Article

# The AC Soft Magnetic Properties of FeCoNi<sub>x</sub>CuAl (1.0 ≤ x ≤ 1.75) High-Entropy Alloys

Zhongyuan Wu <sup>1</sup>, Chenxu Wang <sup>1</sup>, Yin Zhang <sup>1</sup>, Xiaomeng Feng <sup>1</sup>, Yong Gu <sup>1,2</sup>, Zhong Li <sup>3</sup>, Huisheng Jiao <sup>4</sup>, Xiaohua Tan <sup>1,\*</sup> and Hui Xu <sup>1,\*</sup>

<sup>1</sup> Institute of Materials, School of Materials Science and Engineering, Shanghai University, Shanghai 200072, China; wzy951122@gmail.com (Z.W.); wcx123581@163.com (C.W.); zhangyin0208@163.com (Y.Z.); fengxiaomeng96@163.com (X.F.); gy2018@hznu.edu.cn (Y.G.)

<sup>2</sup> Qianjiang College, Hangzhou Normal University, Hangzhou 310036, China

<sup>3</sup> College of Materials and Environmental Engineering, Institute for Advanced Magnetic Materials, Hangzhou Dianzi University, Hangzhou 310018, China; hanying880205@163.com

<sup>4</sup> Tescan China, Ltd., Shanghai 201112, China; Huisheng.Jiao@tescanchina.com

\* Correspondence: tanxiaohua123@163.com (X.T.); Huixu8888@shu.edu.cn (H.X.); Tel.: +86-021-563-378-87 (H.X.)

**Table S1.** Direct current (DC) soft magnetic properties of FeCoNi<sub>x</sub>CuAl (1.0 ≤ x ≤ 1.75) high-entropy alloys.

| x    | M <sub>s</sub> (Am <sup>2</sup> /kg) | μ <sub>i</sub> | μ <sub>m</sub> | P <sub>u</sub> (J/m <sup>3</sup> ) | B <sub>r</sub> (mT) | H <sub>c</sub> (A/m) |
|------|--------------------------------------|----------------|----------------|------------------------------------|---------------------|----------------------|
| 1.00 | 78.69                                | 45.6           | 150.0          | 2019                               | 293.6               | 998.8                |
| 1.25 | 75.60                                | 132.4          | 300.8          | 737.2                              | 235.3               | 383.0                |
| 1.50 | 59.33                                | 213.4          | 383.3          | 241.1                              | 127.8               | 178.3                |
| 1.75 | 54.44                                | 181.1          | 289.4          | 205.2                              | 88.7                | 167.8                |

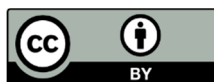

© 2019 by the authors. Submitted for possible open access publication under the terms and conditions of the Creative Commons Attribution (CC BY) license (<http://creativecommons.org/licenses/by/4.0/>).
